# Supplementary material for: Lymph node homeostasis and adaptation to immune challenge resolved by fibroblast network mechanics
Source: PubMed Central journal article supplement (PMC9355877; doi:10.1038/s41590-022-01272-5), 2022-07-26
Supplement: 41590_2022_1272_MOESM1_ESM.pdf [file 41590_2022_1272_MOESM1_ESM.pdf]

**Supplementary information**

---

**Lymph node homeostasis and adaptation to immune challenge resolved by fibroblast network mechanics**

---

In the format provided by the authors and unedited

| Antibody                                                    | Species            | Dilution               | Manufacturer                 | Product ID | Validation                                                                                                          |
|-------------------------------------------------------------|--------------------|------------------------|------------------------------|------------|---------------------------------------------------------------------------------------------------------------------|
| Alexa Fluor 405                                             | Donkey anti-rat    | 1:500(IF)              | abcam                        | ab175670   |                                                                                                                     |
| Alexa Fluor 488                                             | Goat-Anti Rabbit   | 1:500 (IF)             | Thermo Fischer Scientific    | A-11034    |                                                                                                                     |
| Alexa Fluor 488                                             | Goat-Anti Hamster  | 1:500 (IF)             | Thermo Fischer Scientific    | A-21110    |                                                                                                                     |
| Alexa Fluor 555                                             | Goat-Anti Rabbit   | 1:500 (IF)             | Thermo Fischer Scientific    | A-21429    |                                                                                                                     |
| Alexa Fluor 594                                             | Donkey-Anti rabbit | 1:500 (IF)             | Abcam                        | ab150076   |                                                                                                                     |
| Alexa Fluor 633 Phalloidin                                  | Amanita phalloides | 1:200 (IF), 1:500 (IF) | Thermo Fischer Scientific    | A-22284    |                                                                                                                     |
| Alexa Fluor 647                                             | Goat-Anti Rabbit   | 1:500 (IF)             | Thermo Fischer Scientific    | A-21245    |                                                                                                                     |
| Alexa Fluor 647                                             | Goat-Anti Hamster  | 1:500 (IF)             | Thermo Fischer Scientific    | a-21451    |                                                                                                                     |
| Alexa Fluor 647                                             | Goat-Anti Rat      | 1:500 (IF)             | Thermo Fischer Scientific    | A-21247    |                                                                                                                     |
| Alexa Fluor 700 CD3 Molecular complex                       | Anti-mouse         | 1:100 (Flow)           | BD                           | 561388     | Validated by flow cytometry on mouse splenocytes                                                                    |
| Anti-aggrus (Podoplanin) clone 8F11                         | Rat anti mouse     | 1:1000 (WB)            | MBL international            | D190-3     | Validated by IF on whole mount mouse lung                                                                           |
| APC Anti-CD25 [clone;PC61]                                  | Anti-mouse         | 1:100 (Flow)           | BioLegend                    | 102012     | Validated by Con A-stimulated (3-days) splenocytes                                                                  |
| APC/Fire 750 cd31 [390]                                     | Anti-mouse         | 1:100 (Flow)           | BioLegend                    | 102434     | Validated by flow cytometry on C57BL/6 mouse splenocytes                                                            |
| Brilliant Violet 421 CD62L                                  | Anti-mouse         | 1:100 (Flow)           | BioLegend                    | 104435     | Validated by flow cytometry on C57BL/6 mouse bone marrow cells                                                      |
| Brilliant Violet 750TM CD45                                 | Anti-mouse         | 1:100 (Flow)           | BioLegend                    | 103157     | Validated by flow cytometry on C57BL/6 mouse splenocytes                                                            |
| BV421 MAdCAM-1 Clone MECA                                   | Rat anti-mouse     | 1:100 (Flow)           | BD                           | 742812     | Validated by flow cytometry on CHO-MAD7 cells                                                                       |
| BV605 CD44                                                  | Anti-mouse         | 1:100 (Flow)           | BD                           | 563058     | Validated by flow cytometry on C57BL/6 mouse bone marrow cells                                                      |
| Caveolin-1                                                  | Rabbit             | 1:1000 (IF)            | Abcam                        | ab2910     | Validated by IF in wild-type HeLa cells and CAV1 knockout HeLa cell lines                                           |
| CD4 PE CF594 Clone RM4 5                                    | Anti-mouse         | 1:100 (Flow)           | BD                           | 562285     | Validated by flow cytometry on mouse splenocytes                                                                    |
| DAPI                                                        |                    | 1:1000 (IF)            | Sigma Aldrich                | D9542-1MG  |                                                                                                                     |
| EHD2                                                        | Rabbit             | 1:500 (IF)             | Abcam                        | ab23935    | Validated by IF of A431 cell line                                                                                   |
| FITC CD19                                                   | Anti-mouse         | 1:100 (Flow)           | BioLegend                    | 152403     | Validated by flow cytometry on C57BL/6 mouse splenocytes                                                            |
| Histone H3                                                  | Mouse              | 1:2000 (WB)            | Abcam                        | 24834      | Validated by Chromatin IP from HeLa cells                                                                           |
| HRP anti mouse                                              | Rabbit anti mouse  | 1:10000 (WB)           | Abcam                        | ab6728     |                                                                                                                     |
| HRP anti Rabbit                                             | Goat anti rabbite  | 1:15000 (WB)           | Abcam                        | ab6721     |                                                                                                                     |
| HRP anti Rat                                                | Rabbit anti Rat    | 1:5000 (WB)            | Abcam                        | ab6734     |                                                                                                                     |
| Ki 67 PE Cy7 Clone B56                                      | anti-mouse         | 1:100 (Flow)           | BD                           | 561283     | Validated by flow cytometry in proliferating Molt-4 and non-cycling human peripheral blood mononuclear cells (PMBC) |
| Ki67                                                        | Rabbit             | (1:200) (IF)           | Abcam                        | ab16667    | Validated by IF in wild-type HAP1 cells and Ki67 knockout HAP-1 cells                                               |
| PDPN                                                        | Hamster            | 1:500 (IF)             | Acris                        | DM3501     | Validated by IHC of mouse liver                                                                                     |
| PE-CF594 CD140a Clone APA5 (RUO)                            | Rat anti-mouse     | 1:100 (Flow)           | BD                           | 562775     | Validated by flow cytometry on mouse fibroblast NIH/3T3 cells                                                       |
| PerCP-Cy5.5 CD8a                                            | Anti-mouse         | 1:100 (Flow)           | BD                           | 561109     | Validated by flow cytometry on mouse splenocytes                                                                    |
| Perlecan AL76                                               | Rat anti-mouse     | 1:100(IF)              | Santa Cruz Biotechnology     | sc-33707   | Validated by IF on mouse eye frozen sections                                                                        |
| Phospho-Ezrin(Thr567)/Radixin(Thr564)/Moesin(Thr558) (3141) | Rabbit             | 1:5000 (WB)            | Cell signalling technologies | 3141L      | Validated with immunoblot of A431 cell lysate                                                                       |
| Phospho-myosin light chain 2 (Ser 19)                       | Rabbit             | 1:30 (IF)              | Cell signalling technologies | 3671L      | Validated by IF in HeLa cell lines and immunoblot with MLCK inhibitor ML-7                                          |
| Podoplanin eFlour 660                                       | Anti-mouse         | 1:100 (Flow)           | eBioscience                  | 50-5381-82 | Validated by flow cytometry on TE-71 cell line                                                                      |
| Zombie Aqua Fixable Viability Kit                           |                    | 1:1000 (Flow)          | BioLegend                    | 423102     |                                                                                                                     |
